# Supplementary material
Source: Springer Nature journal article supplement (https://www.springermedizin.de/resource/supplementary/12885_2010_2102_MOESM3_ESM.pdf/9460528)

# *TGFβ-RII*

## Patient 11

Normal (A)<sup>10</sup>    Tumor (A)<sup>9</sup>

A C G T A C G T

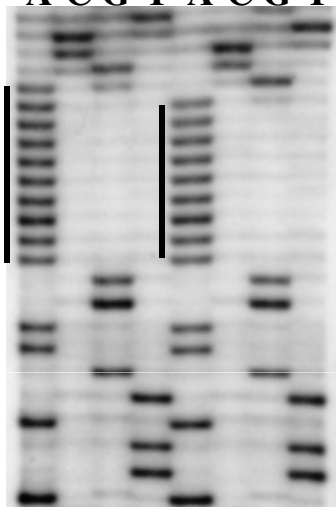

# *hMSH3*

## Patient 12

Normal (A)<sup>8</sup>    Tumor (A)<sup>7</sup>

A C G T A C G T

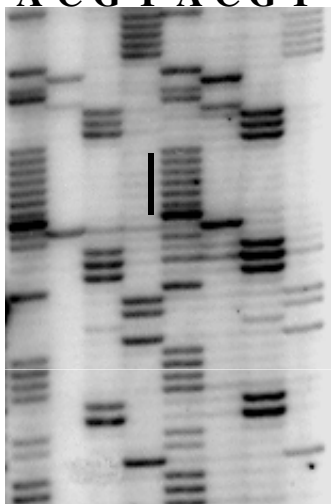

# *BAX*

## Patient 10

Tumor (G)<sup>7</sup>    Normal (G)<sup>8</sup>

A C G T A C G T

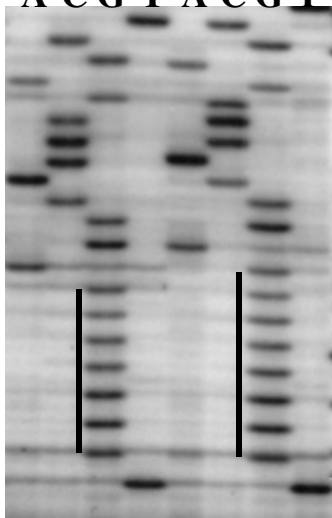

# *hMSH6*

## Patient 12

Normal (C)<sup>8</sup>    Tumor (C)<sup>7</sup>

A C G T A C G T

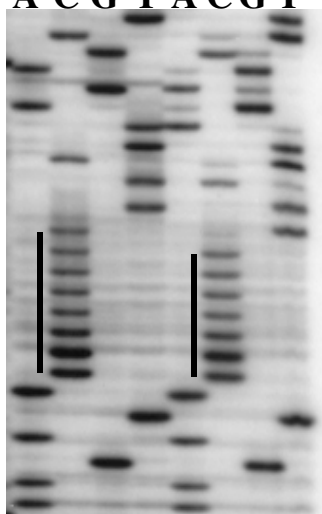

Supplement: MOESM3 [file 9460528]
